# Supplementary material for: A facile synthesis of functionalized 7,8-diaza[5]helicenes through an oxidative ring-closure of 1,1’-binaphthalene-2,2’-diamines (BINAMs)
Source: publisher site journal article supplement (doi:10.3762/bjoc.11.2), 2015-01-05
Supplement: Additional file 1 [file 1860-5397-11-2-S1.pdf]

# Supporting Information

for

## A facile synthesis of functionalized 7,8-diaza[5]helicenes through an oxidative ring-closure of 1,1'-binaphthalene-2,2'-diamines (BINAMs)

Youhei Takeda\*<sup>1,2</sup>, Masato Okazaki<sup>2</sup>, Yoshiaki Maruoka<sup>2</sup>, and Satoshi Minakata\*<sup>2</sup>

Address: <sup>1</sup>Frontier Research Base for Global Young Researchers, Graduate School of Engineering, Osaka University, Yamadaoka 2-1, Suita, Osaka 565-0871, Japan and <sup>2</sup>Department of Applied Chemistry, Graduate School of Engineering, Osaka University, Yamadaoka 2-1, Suita, Osaka 565-0871, Japan

Email: Youhei Takeda - [takeda@chem.eng.osaka-u.ac.jp](mailto:takeda@chem.eng.osaka-u.ac.jp); Satoshi Minakata - [minakata@chem.eng.osaka-u.ac.jp](mailto:minakata@chem.eng.osaka-u.ac.jp)

\*Corresponding author

### Table of contents

|                                                                |         |
|----------------------------------------------------------------|---------|
| General remarks                                                | S2      |
| Materials                                                      | S2–S3   |
| Optimization studies of reaction conditions                    | S3–S6   |
| Oxidative ring-closure of biaryldiamines <b>1</b> and <b>3</b> | S7–S11  |
| Physicochemical properties                                     | S12–S16 |
| <sup>1</sup> H and <sup>13</sup> C NMR spectra                 | S17–S23 |
| References                                                     | S24     |

## General remarks

All reactions were carried out under an atmosphere of nitrogen unless otherwise noted. Melting points were determined on a Stanford Research Systems MPA100 OptiMelt Automated Melting Point System.  $^1\text{H}$  and  $^{13}\text{C}$  NMR spectra were recorded on a JEOL JMTC-400/54/SS spectrometer ( $^1\text{H}$  NMR, 400 MHz;  $^{13}\text{C}$  NMR, 100 MHz) using tetramethylsilane as an internal standard. Infrared spectra were acquired on a SHIMADZU IRAffinity-1 FT-IR Spectrometer. Mass spectra were obtained on a JEOL JMS-DX303HF mass spectrometer. High-resolution mass spectra were obtained on a JEOL JMS-DX303HF mass spectrometer. UV/vis spectra were recorded on a Shimadzu UV-2550 spectrophotometer. Emission spectra were recorded on a HAMAMATSU C11347-01 spectrometer with an integrating sphere. Cyclic voltammetry (CV) was performed with ALS-600 (BAS Inc.) system. Thermogravimetric analysis (TGA) was performed with TG/DTA-7200 (SII) system. Products were purified by chromatography on silica gel BW-300 and Chromatorex NH (Fuji Silysia Chemical Ltd.). Analytical thin-layer chromatography (TLC) was performed on pre-coated silica gel glass plates (Merck silica gel 60 F<sub>254</sub> and Fuji Silysia Chromatorex NH, 0.25 mm thickness). Compounds were visualized with UV lamp. Optical rotations were measured in a thermostated conventional 10 cm cell on a JASCO P-2200 polarimeter using the sodium-D line (589 nm).

## Materials

1,1'-Binaphthalene-2,2'-diamine (BINAM) was purchased from Sigma-Aldrich and used as received. DBU, triethylamine, and 2,6-lutidine were distilled with Kugelrohr apparatus, and other commercial reagents were purchased from Sigma-Aldrich, TCI, or Wako Pure Chemical Industries, Ltd. and used as received. Alcohol solvents were dried over activated molecular sieves 3A. THF, CH<sub>3</sub>CN, and Et<sub>2</sub>O were purchased as dehydrated grade and dried by passing through a glass contour solvent dispensing system (Nikko Hansen & Co., Ltd.). Dehydrated CH<sub>2</sub>Cl<sub>2</sub> and toluene were purchased from Kanto Chemical Co., Inc. and used as received. DMF was distilled using CaSO<sub>4</sub> as a dehydrating agent. CH<sub>2</sub>Cl<sub>2</sub> (fluorescence spectroscopic grade) was purchased from Kanto Chemical Co., Inc. for the measurement of UV-vis and emission spectra. Biaryldiamines **1b**<sup>S1</sup> [360779-01-7], **1c**<sup>S2</sup> [1051425-55-8, (*R*)-enantiomer], **1d**<sup>S3</sup> [1229013-43-7], **1e**<sup>S4</sup> [155855-47-3], **1g**<sup>S5</sup> [861890-12-2], and **3**<sup>S6</sup> [1454-80-4] were prepared according to the procedures in literature.

## Preparation of 6,6'-di-*n*-butyl-1,1'-binaphthalene-2,2'-diamine (**1f**)

Biaryldiamine **1f** was prepared by modified cross-coupling method<sup>S7</sup> from biaryldiamine **1g** as follows (Scheme S1): THF was degassed through freeze-pump-thaw cycling for three times before used. To a round-bottomed flask (50 mL) equipped with a

magnetic stir bar, were added biaryldiamine **1g** (1.326 g, 3.0 mmol), Pd(OAc)<sub>2</sub> (13.4 mg, 0.06 mmol), and SPhos (49.2 mg, 0.12 mmol) under the air. The tube was capped with a rubber septum, evacuated, and then refilled with N<sub>2</sub> gas for three times. THF (2 mL) and 0.5 M THF solution of *n*-BuZnBr (14.4 mL, 7.2 mmol) were added to the tube through the septum, and the mixture was stirred under N<sub>2</sub> atmosphere at room temperature for 12 h. To the reaction mixture, was added saturated aqueous NH<sub>4</sub>Cl solution (10 mL), and the resulting mixture was extracted with EtOAc (20 mL × 3). The organic extract was dried over Na<sub>2</sub>SO<sub>4</sub> and concentrated under vacuum to give the crude product. Purification by flash column chromatography on silica gel (eluent: hexane/EtOAc 8:2) gave biaryldiamine **1f** as pale brown solid (1.051 g, 88%). mp 130 °C (dec.); *R*<sub>f</sub> 0.13 (hexane/EtOAc 8:2); <sup>1</sup>H NMR (400 MHz, CDCl<sub>3</sub>) δ 0.92 (t, *J* = 7.2 Hz, 6H), 1.37 (tq, *J* = 7.2, 7.6 Hz, 4H), 1.63 (tt, *J* = 7.6, 7.6 Hz, 4H), 2.68 (t, *J* = 7.6 Hz, 4H), 3.60 (br, 4 H), 7.01 (d, *J* = 8.8 Hz, 2H), 7.05 (dd, *J* = 1.6, 8.8 Hz, 2H), 7.11 (d, *J* = 8.8 Hz, 2H), 7.56 (d, *J* = 1.6 Hz, 2H), 7.72 (d, *J* = 8.8 Hz, 2H); <sup>13</sup>C NMR (100 MHz, CDCl<sub>3</sub>) δ 13.9, 22.4, 33.5, 35.4, 112.9, 118.3, 123.9, 126.6, 128.3, 128.6, 128.8, 132.0, 136.8, 141.9; IR (ATR)  $\nu$  2929, 1606, 1500, 1382, 1282, 824, 810 cm<sup>-1</sup>; MS (EI): *m/z* (relative intensity, %) 396 (M<sup>+</sup>, 100), 353 ([C<sub>25</sub>H<sub>25</sub>N<sub>2</sub>]<sup>+</sup>, 45); HRMS (EI): *m/z* calcd for C<sub>28</sub>H<sub>32</sub>N<sub>2</sub> (M) 396.2565, found 396.2568.

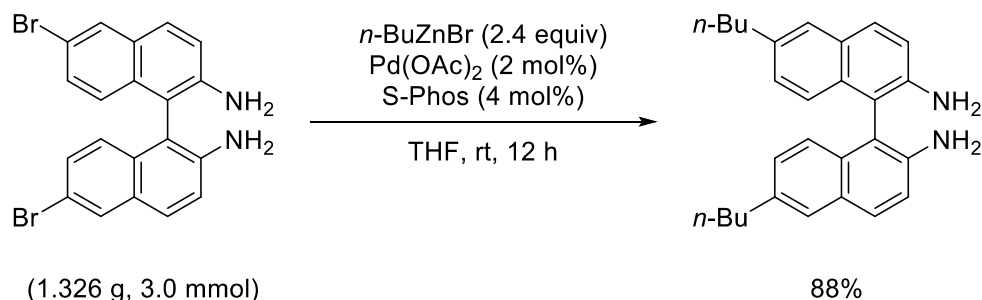

**Scheme S1.** Preparation of **1f**.

### Optimization studies of reaction conditions

#### A typical procedure for the optimization studies using **1a** as substrate

To a two-necked reaction tube (20 mL, entry 2 in Table S1) or a two-necked round-bottomed flask (50 mL, entries 1 and 3–11 in Table S1, Table S2, and Table S3) equipped with a magnetic stir bar, was added 1,1'-binaphthalene-2,2'-diamine (**1a**) (0.2 mmol) under the air. The vessel was capped with a rubber septum and evacuated and refilled with N<sub>2</sub> gas for three times, and an appropriate solvent was added through the septum. To the mixture, were added an additive and an appropriate oxidant under a stream of N<sub>2</sub> gas at the indicated temperature. The resulting solution was stirred for indicated time before quenched with aqueous Na<sub>2</sub>S<sub>2</sub>O<sub>3</sub> solution (1.0 M, 20 mL), and the resulting mixture was extracted with

CH<sub>2</sub>Cl<sub>2</sub> (20 mL × 3). The combined organic extracts were dried over Na<sub>2</sub>SO<sub>4</sub> and concentrated under vacuum to give the crude product. The yields of products were calculated by the integration of <sup>1</sup>H NMR signals of the crude product. Separation by flash column chromatography on silica gel gave product **2a**.

### 7,8-Diaza[5]helicene (**2a**) [188-55-6]

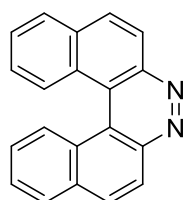

Spectroscopic data were in good agreement with those previously reported.<sup>S8</sup>

The spectroscopic data are also available in our previous paper.<sup>S9</sup> Purified by flash column chromatography on silica gel (eluent: hexane/EtOAc, 99:1 to 5:5) and recrystallization from CHCl<sub>3</sub>; Yellow solid; *R<sub>f</sub>* 0.15 (hexane/EtOAc 8:2); MS (EI): *m/z* (relative intensity, %) 280 (M<sup>+</sup>, 70), 252 ([C<sub>20</sub>H<sub>12</sub>]<sup>+</sup>, 100);

HRMS (EI): *m/z* calcd for C<sub>20</sub>H<sub>12</sub>N<sub>2</sub> (M) 280.1000, found 280.1002.

**Table S1.** The effect of solvents.

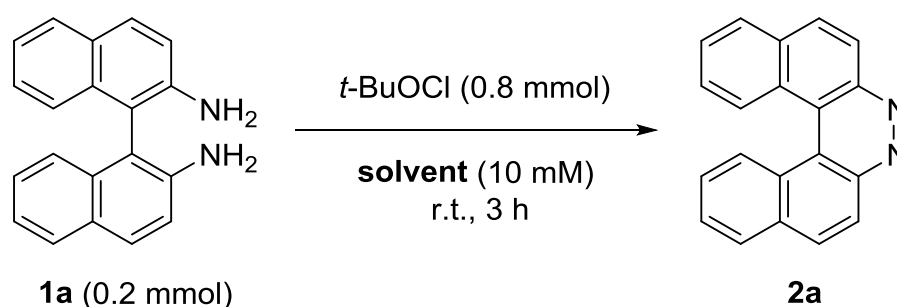

| entry | solvent                         | yield (%) <sup>a</sup> | recovery of <b>1a</b> (%) <sup>a</sup> |
|-------|---------------------------------|------------------------|----------------------------------------|
| 1     | <i>t</i> -BuOH                  | 89 <sup>b</sup>        | 0                                      |
| 2     | <i>t</i> -BuOH <sup>c</sup>     | 54                     | 0                                      |
| 3     | THF                             | 30                     | 0                                      |
| 4     | CH <sub>3</sub> CN              | 22                     | 0                                      |
| 5     | CH <sub>2</sub> Cl <sub>2</sub> | 52                     | 0                                      |
| 6     | toluene                         | 68                     | 0                                      |
| 7     | DMF                             | 62                     | 0                                      |
| 8     | Et <sub>2</sub> O               | 37                     | 0                                      |
| 9     | 2-propanol                      | 47                     | 48                                     |
| 10    | EtOH                            | 61                     | 0                                      |
| 11    | MeOH                            | 58                     | 0                                      |

<sup>a</sup> <sup>1</sup>H NMR yields. <sup>b</sup> isolated yield. <sup>c</sup> 40 mM.

**Table S2.** The effect of chlorine-containing oxidants.

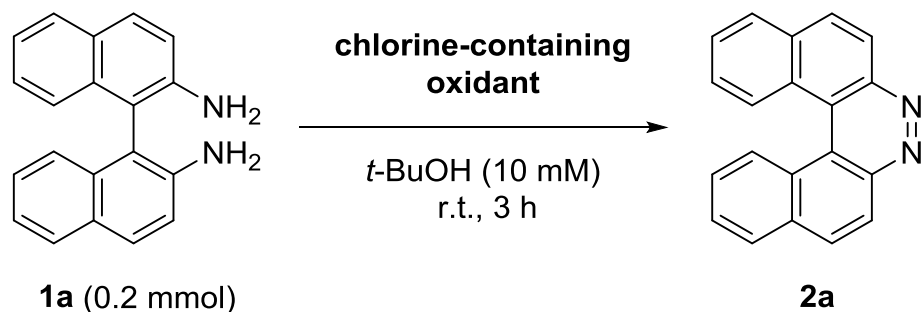

| entry | chlorine-containing oxidant (mmol) | yield (%) <sup>a</sup> | recovery of <b>1a</b> (%) <sup>a</sup> |
|-------|------------------------------------|------------------------|----------------------------------------|
| 1     | NCS (0.8)                          | 0                      | 63                                     |
| 2     | DCH (0.4)                          | 24 <sup>b</sup>        | 0                                      |
| 3     | DCH (0.8)                          | 57                     | 0                                      |
| 4     | NCPH (0.8)                         | 0                      | 95                                     |
| 5     | TCCA (0.27)                        | 20                     | 0                                      |

<sup>a</sup> <sup>1</sup>H NMR yields. <sup>b</sup> isolated yield.

Structures of chlorine-containing oxidants:

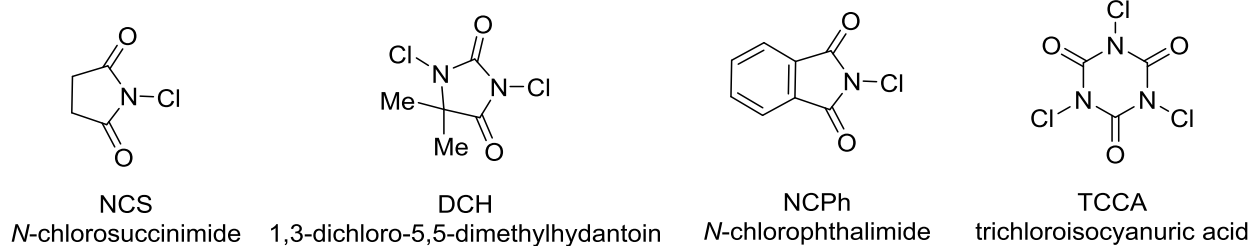

**Table S3.** The effect of equivalents of *t*-BuOCl and bases.

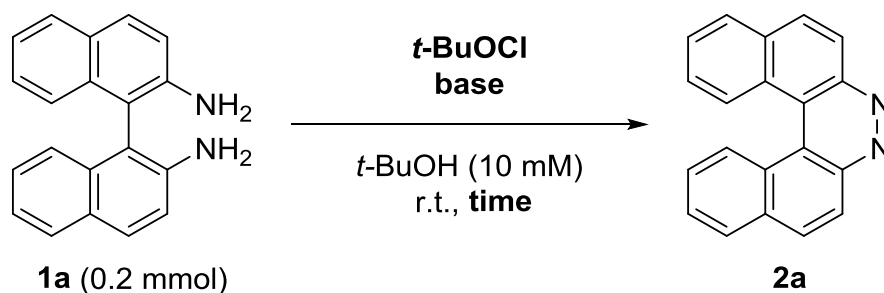

| entry | <i>t</i> -BuOCl (mmol) | base (mmol)                              | time (h) | yield (%) <sup>a</sup> | recovery of <b>1a</b> (%) <sup>a</sup> |
|-------|------------------------|------------------------------------------|----------|------------------------|----------------------------------------|
| 1     | 0.6                    | -                                        | 3        | 93                     | 0                                      |
| 2     | 0.4                    | -                                        | 3        | 54                     | 34                                     |
| 3     | 0.4                    | -                                        | 24       | 71                     | 19                                     |
| 4     | 0.4                    | K <sub>2</sub> CO <sub>3</sub> (0.4)     | 3        | 69                     | 20                                     |
| 5     | 0.4                    | DABCO (0.4)                              | 3        | 32                     | 45                                     |
| 6     | 0.4                    | DBU (0.4)                                | 3        | 0                      | 34                                     |
| 7     | 0.4                    | NEt <sub>3</sub> (0.4)                   | 3        | 0                      | 65                                     |
| 8     | 0.4                    | pyridine (0.4)                           | 3        | 33                     | 40                                     |
| 9     | 0.4                    | 2,6-di- <i>tert</i> -butylpyridine (0.4) | 3        | 77                     | 19                                     |
| 10    | 0.4                    | 2,6-lutidine (0.4)                       | 3        | 90                     | 10                                     |
| 11    | 0.4                    | 2,6-lutidine (0.4)                       | 7        | 92                     | 8                                      |
| 12    | 0.44                   | 2,6-lutidine (0.44)                      | 3        | 97 <sup>b</sup>        | 0                                      |

<sup>a</sup> <sup>1</sup>H NMR yields. <sup>b</sup> isolated yield.

Structures of bases

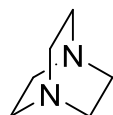

DABCO

1,4-diazabicyclo[2.2.2]octane

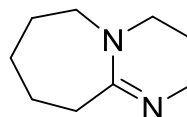

DBU

1,8-diazabicyclo[5.4.0]undec-7-ene

### Oxidative ring-closure of biaryldiamines **1** and **3**

#### A typical procedure for the oxidative ring-closure of biaryldiamines **1** and **3**

To a two-necked round-bottomed flask (50 mL) equipped with a magnetic stir bar, was added biaryldiamine **1** (or **3**) (0.1 mmol) under the air. The flask was capped with a

rubber septum, evacuated, and refilled with N<sub>2</sub> gas for three times. Solvent (10 mL) and 2,6-lutidine (23.5 mg, 0.22 mmol or none) were added to the tube through the septum. To the mixture, was added *t*-BuOCl (23.8 mg, 0.22 mmol or 43.4 mg, 0.40 mmol) through the septum at the indicated temperature. The resulting solution was stirred for the indicated time (Table 2 in the text) before quenched with aqueous Na<sub>2</sub>S<sub>2</sub>O<sub>3</sub> solution (1.0 M, 20 mL), and the resulting mixture was extracted with CH<sub>2</sub>Cl<sub>2</sub> (20 mL × 3). The combined organic extracts were dried over Na<sub>2</sub>SO<sub>4</sub> and concentrated under vacuum to give the crude product. Purification by flash column chromatography on silica gel gave the corresponding 7,8-diaza[5]helicene (for example, compound **2a**: 27.2 mg, 97%).

**Table S4.** The oxidative ring-closure of biaryldiamine **1b**.

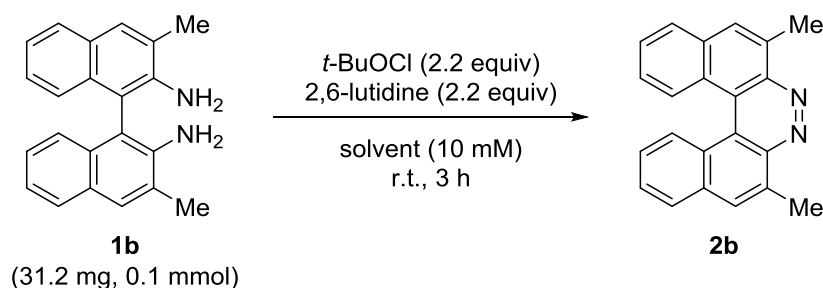

| entry | solvent                         | yield (%) <sup>a</sup> | recovery of <b>1b</b> (%) <sup>a</sup> |
|-------|---------------------------------|------------------------|----------------------------------------|
| 1     | <i>t</i> -BuOH                  | 32                     | 22                                     |
| 2     | MeOH                            | 17                     | 28                                     |
| 3     | CH <sub>2</sub> Cl <sub>2</sub> | 16                     | trace                                  |
| 4     | toluene                         | 44 <sup>b</sup>        | 11 <sup>b</sup>                        |

<sup>a</sup> <sup>1</sup>H NMR yields. <sup>b</sup> isolated yield.

### 6,9-Dimethyl-7,8-diaza[5]helicene (**2b**)

Purified by flash column chromatography on NH silica gel (eluent: hexane/EtOAc 99:1) and recrystallization from hexane; Yellow solid (13.6 mg, 44%); mp 196 °C (dec.); *R*<sub>f</sub> 0.33 (hexane/EtOAc 8:2, NH); <sup>1</sup>H NMR (400 MHz, CDCl<sub>3</sub>) δ 3.16 (s, 6H), 7.31 (dd, *J* = 8.0, 8.0 Hz, 2H), 7.64 (dd, *J* = 8.0, 8.0 Hz, 2H), 7.91 (d, *J* = 8.0 Hz, 2H), 7.95 (s, 2H), 8.71 (d, *J* = 8.0 Hz, 2H); <sup>13</sup>C NMR (100 MHz, CDCl<sub>3</sub>) δ 18.5, 120.0, 124.5, 127.3, 127.5, 129.2, 129.5, 129.8, 134.0, 134.2, 145.9; IR (ATR)  $\nu$  2922, 1734, 1457, 1425, 1261, 1160, 1116, 889, 753 cm<sup>-1</sup>; MS (EI): *m/z* (relative intensity, %) 308 (M<sup>+</sup>, 100), 280 ([C<sub>22</sub>H<sub>16</sub>]<sup>+</sup>, 31); HRMS (EI): *m/z* calcd for C<sub>22</sub>H<sub>16</sub>N<sub>2</sub> (M) 308.1313, found 308.1312.

**Table S5.** The oxidative ring-closure of biaryldiamine **1c**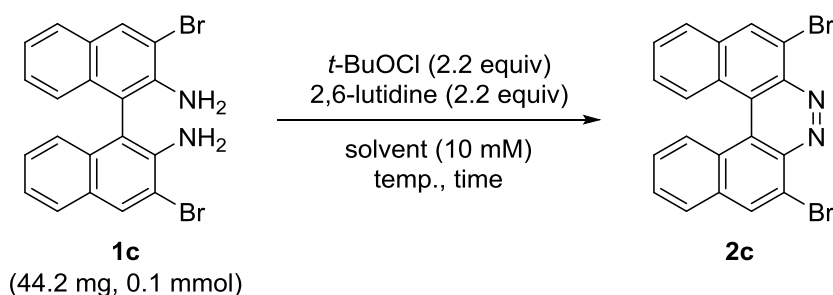

| entry          | solvent        | temp. (°C) | time (h) | yield (%) <sup>a</sup> | recovery of <b>1c</b> (%) <sup>a</sup> |
|----------------|----------------|------------|----------|------------------------|----------------------------------------|
| 1              | <i>t</i> -BuOH | rt         | 20       | 44 <sup>b</sup>        | 15 <sup>b</sup>                        |
| 2 <sup>c</sup> | <i>t</i> -BuOH | rt         | 19       | 77 <sup>b</sup>        | 0                                      |
| 3              | <i>t</i> -BuOH | 60         | 24       | 36                     | 12                                     |
| 4              | MeOH           | rt         | 9        | 9                      | 28                                     |
| 5              | toluene        | rt         | 24       | 15                     | 0                                      |

<sup>a</sup> <sup>1</sup>H NMR yields. <sup>b</sup> isolated yield. <sup>c</sup> *t*-BuOCl (4.0 equiv), 2,6-lutidine (0 equiv)

### 6,9-Dibromo-7,8-diaza[5]helicene (**2c**)

Parts of spectroscopic data are available in a literature.<sup>S10</sup> Purified by flash column chromatography on silica gel (eluent: hexane/EtOAc 99:1–95:5) and recrystallization from hexane/CHCl<sub>3</sub>; Yellow solid (19.3 mg, 44% or 33.7 mg, 77%); mp 307 °C (dec.); *R*<sub>f</sub> 0.40 (hexane/EtOAc 8:2); <sup>1</sup>H NMR (400 MHz, CDCl<sub>3</sub>) δ 7.41 (dd, *J* = 8.0, 8.0 Hz, 2H), 7.71 (dd, *J* = 8.0, 8.0 Hz, 2H), 7.94 (d, *J* = 8.0 Hz, 2H), 8.51 (s, 2H), 8.64 (d, *J* = 8.0 Hz, 2H); <sup>13</sup>C NMR (100 MHz, CDCl<sub>3</sub>) δ 121.3, 121.6, 126.0, 127.4, 127.5, 129.5, 130.3, 134.4, 134.5, 143.6; IR (ATR)  $\nu$  3053, 1591, 1383, 1250, 1108, 960, 890, 837, 773, 753 cm<sup>-1</sup>; MS (EI): *m/z* (relative intensity, %) 438 (M<sup>+</sup>, 50), 357 ([C<sub>20</sub>H<sub>10</sub>BrN<sub>2</sub>]<sup>+</sup>, 14), 278 ([C<sub>20</sub>H<sub>10</sub>N<sub>2</sub>]<sup>+</sup>, 23), 250 ([C<sub>20</sub>H<sub>10</sub>]<sup>+</sup>, 100); HRMS (EI): *m/z* calcd for C<sub>20</sub>H<sub>10</sub>Br<sub>2</sub>N<sub>2</sub> (M) 435.9211, found 435.9210.



**Table S6.** The oxidative ring-closure of biaryldiamine **1d**.

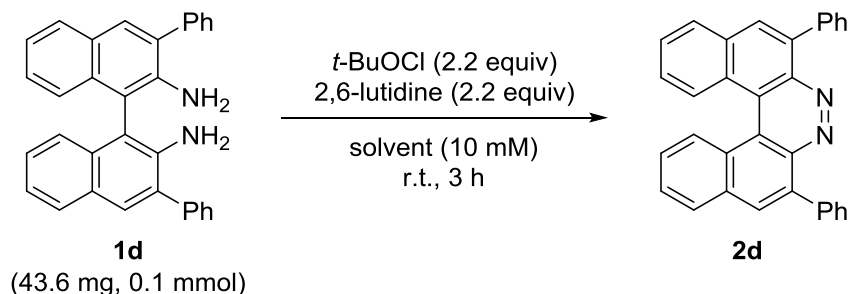

| entry | solvent        | yield (%) <sup>a</sup> | recovery of <b>1d</b> (%) <sup>a</sup> |
|-------|----------------|------------------------|----------------------------------------|
| 1     | <i>t</i> -BuOH | 33 <sup>b</sup>        | 18 <sup>b</sup>                        |
| 2     | MeOH           | 28                     | 24                                     |
| 3     | toluene        | 87 <sup>b</sup>        | 0                                      |

<sup>a</sup> <sup>1</sup>H NMR yields. <sup>b</sup> isolated yield.

### 6,9-Diphenyl-7,8-diaza[5]helicene (**2d**)

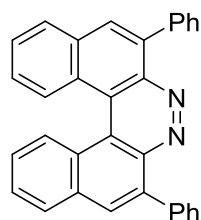

Purified by flash column chromatography on silica gel (eluent: hexane/EtOAc 97:3) and recrystallization from hexane/CHCl<sub>3</sub>; Yellow solid (37.6 mg, 87%); mp 239 °C (dec.); *R*<sub>f</sub> 0.35 (hexane/EtOAc 8:2); <sup>1</sup>H NMR (400 MHz, CDCl<sub>3</sub>) δ 7.43–7.45 (m, 4H), 7.50 (dd, *J* = 7.6, 7.6 Hz, 4H), 7.72 (dd, *J* = 7.6, 7.6 Hz, 2H), 7.82 (d, *J* = 6.8 Hz, 4H), 8.06 (d, *J* = 7.6 Hz, 2H), 8.17 (s, 2H), 8.79 (d, *J* = 8.8 Hz, 2H); <sup>13</sup>C NMR (100 MHz, CDCl<sub>3</sub>) δ 120.1, 125.4, 127.7, 128.0, 128.1, 128.3, 129.4, 129.5, 130.9, 131.2, 133.8, 137.8, 138.4, 144.6; IR (ATR)  $\nu$  3027, 1494, 1445, 898, 766, 754 cm<sup>-1</sup>; MS (EI): *m/z* (relative intensity, %) 432 (M<sup>+</sup>, 67), 431 ([C<sub>32</sub>H<sub>19</sub>N<sub>2</sub>]<sup>+</sup>, 100); HRMS (EI): *m/z* calcd for C<sub>32</sub>H<sub>20</sub>N<sub>2</sub> (M) 432.1626, found 432.1624.

### Dimethyl 7,8-diaza[5]helicene-6,9-dicarboxylate (**2e**)

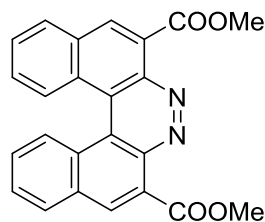

Purified by flash column chromatography on silica gel (eluent: hexane/EtOAc 8:2–5:5) and recrystallization from hexane/CHCl<sub>3</sub>; Yellow solid (33.3 mg, 84%); mp 215 °C (dec.); *R*<sub>f</sub> 0.35 (hexane/EtOAc 5:5); <sup>1</sup>H NMR (400 MHz, CDCl<sub>3</sub>) δ 4.14 (s, 6H), 7.48 (dd, *J* = 8.0, 8.0 Hz, 2H), 7.75 (dd, *J* = 8.0, 8.0 Hz, 2H), 8.07 (d, *J* = 8.0 Hz, 2H), 8.45 (s, 2H), 8.69 (d, *J* = 8.0 Hz, 2H); <sup>13</sup>C NMR (100 MHz, CDCl<sub>3</sub>) δ 53.1, 119.7,

127.2, 128.8, 129.1, 129.2, 129.4, 130.1, 132.1, 132.6, 143.3, 168.0; IR (ATR)  $\nu$  2942, 1724, 1425, 1269, 1220, 1137, 781, 761  $\text{cm}^{-1}$ ; MS (EI):  $m/z$  (relative intensity, %) 396 ( $\text{M}^+$ , 32), 338 ( $[\text{C}_{22}\text{H}_{14}\text{N}_2\text{O}_2]^+$ , 100), 250 ( $[\text{C}_{20}\text{H}_{10}]^+$ , 18); HRMS (EI):  $m/z$  calcd for  $\text{C}_{24}\text{H}_{16}\text{N}_2\text{O}_4$  (M) 396.1110, found 396.1112.

**Table S7.** The oxidative ring-closure of biaryldiamine **1f**.

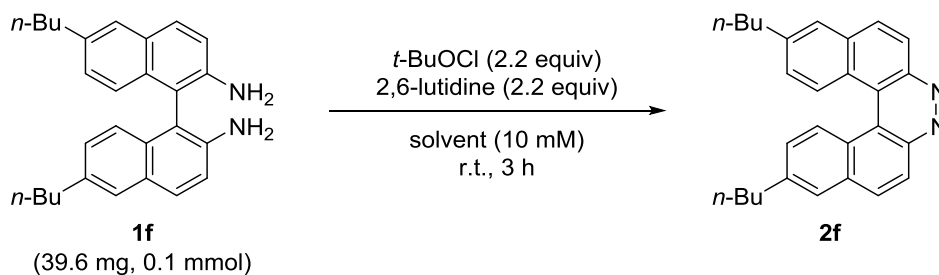

| entry | solvent        | yield (%) <sup>a</sup> | recovery of <b>1f</b> (%) <sup>a</sup> |
|-------|----------------|------------------------|----------------------------------------|
| 1     | <i>t</i> -BuOH | 49                     | 23                                     |
| 2     | MeOH           | 26                     | 0                                      |
| 3     | toluene        | 72 <sup>b</sup>        | 0                                      |

<sup>a</sup> <sup>1</sup>H NMR yields. <sup>b</sup> isolated yield.

### 3,12-Di-*n*-butyl-7,8-diaza[5]helicene (**2f**)

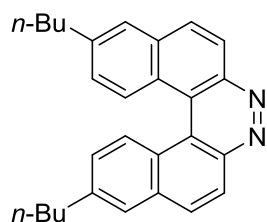

Purified by flash column chromatography on silica gel (eluent: hexane/EtOAc 9:1–8:2) and recrystallization from hexane; Pale yellow solid (28.2 mg, 72%); mp 161 °C (dec.);  $R_f$  0.18 (hexane/EtOAc 8:2); <sup>1</sup>H NMR (400 MHz,  $\text{CDCl}_3$ )  $\delta$  0.99 (t,  $J = 7.6$  Hz, 6H), 1.44 (tq,  $J = 7.6, 7.6$  Hz, 4H), 1.76 (tt,  $J = 7.6, 7.6$  Hz, 4H), 2.86 (t,  $J = 7.6$  Hz, 4H), 7.28 (dd,  $J = 1.6, 8.4$  Hz, 2H), 7.80 (d,  $J = 1.6$  Hz, 2H), 8.09 (d,  $J = 8.8$  Hz, 2H), 8.49 (d,  $J = 8.8$  Hz, 2H), 8.75 (d,  $J = 8.4$  Hz, 2H); <sup>13</sup>C NMR (100 MHz,  $\text{CDCl}_3$ )  $\delta$  13.9, 22.5, 33.3, 35.7, 120.0, 126.1, 126.5, 126.9, 129.1, 130.5, 134.4, 144.6, 146.6 (one carbon is unsatisfied, probably due to the overlap of signals.); IR (ATR)  $\nu$  2930, 1618, 1464, 1259, 1105, 891, 827, 810  $\text{cm}^{-1}$ ; MS (EI):  $m/z$  (relative intensity, %) 392 ( $\text{M}^+$ , 100), 364 ( $[\text{C}_{28}\text{H}_{28}]^+$ , 15), 349 ( $[\text{C}_{27}\text{H}_{25}]^+$ , 12), 335 ( $[\text{C}_{26}\text{H}_{23}]^+$ , 31), 321 ( $[\text{C}_{25}\text{H}_{21}]^+$ , 17), 307 ( $[\text{C}_{24}\text{H}_{19}]^+$ , 47); HRMS (EI):  $m/z$  calcd for  $\text{C}_{28}\text{H}_{28}\text{N}_2$  (M) 392.2252, found 392.2251.

### 3,12-Dibromo-7,8-diaza[5]helicene (2g)

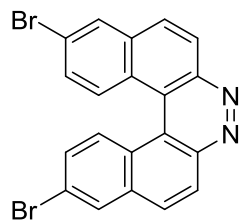

Purified by flash column chromatography on silica gel (eluent: hexane/EtOAc 9:1–7:3) and recrystallization from CHCl<sub>3</sub>; Brown solid (39.9 mg, 91%); mp 205 °C (dec.); *R*<sub>f</sub> 0.18 (hexane/EtOAc 8:2); <sup>1</sup>H NMR (400 MHz, CDCl<sub>3</sub>) δ 7.55 (dd, *J* = 2.0, 8.8 Hz, 2H), 8.09 (d, *J* = 8.8 Hz, 2H), 8.20 (d, *J* = 2.0 Hz, 2H), 8.58 (d, *J* = 8.8 Hz, 2H), 8.61 (d, *J* = 8.8 Hz, 2H); <sup>13</sup>C NMR (100 MHz, CDCl<sub>3</sub>) δ 119.4, 123.8, 126.4, 127.9, 129.0, 129.8, 130.4, 130.5, 135.6, 146.5; IR (ATR)  $\nu$  3061, 1591, 1495, 1436, 1263, 1086, 876, 852, 833, 820, 803 cm<sup>-1</sup>; MS (EI): *m/z* (relative intensity, %) 438 (M<sup>+</sup>, 69), 278 ([C<sub>20</sub>H<sub>10</sub>N<sub>2</sub>]<sup>+</sup>, 79), 250 ([C<sub>20</sub>H<sub>10</sub>]<sup>+</sup>, 100); HRMS (EI): *m/z* calcd for C<sub>20</sub>H<sub>10</sub>N<sub>2</sub>Br<sub>2</sub> (M) 435.9211, found 435.9208.

**Table S8.** The oxidative ring-closure of biaryldiamine **3**.

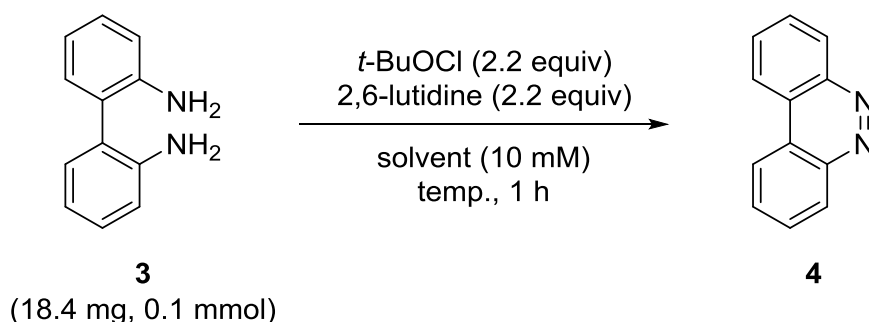

| entry | solvent        | temp. (°C) | yield (%) <sup>a</sup> | recovery of <b>3</b> (%) <sup>a</sup> |
|-------|----------------|------------|------------------------|---------------------------------------|
| 1     | <i>t</i> -BuOH | rt         | 53                     | trace                                 |
| 2     | MeOH           | rt         | 42                     | 0                                     |
| 3     | MeOH           | 0          | 65 <sup>b</sup>        | 0                                     |
| 4     | MeOH           | -40        | 85 <sup>b</sup>        | 0                                     |

<sup>a</sup> <sup>1</sup>H NMR yields. <sup>b</sup> isolated yields.

### Benzo[*c*]cinnoline (**4**) [230-17-1]

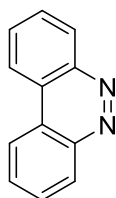

Spectroscopic data were in agreement with those previously reported.<sup>S11</sup> The spectroscopic data are also available in our previous paper.<sup>S9</sup> Purified by flash column chromatography on silica gel (hexane/EtOAc 95:5 to 8:2); Yellow solid; *R*<sub>f</sub> 0.18 (hexane/EtOAc 8:2).

## Physicochemical properties

**Table S9.** Summary of physicochemical properties of diazahelicenes **2** and cinnoline **4**.

|           | Absorption                  |                                                | Emission (solution)        |                    | CV (vs. Fc/Fc <sup>+</sup> )     |                                  |                            |                 | TGA                             |
|-----------|-----------------------------|------------------------------------------------|----------------------------|--------------------|----------------------------------|----------------------------------|----------------------------|-----------------|---------------------------------|
|           | $\lambda_{\text{max}}$ (nm) | $\epsilon$ (M <sup>-1</sup> cm <sup>-1</sup> ) | $\lambda_{\text{ex}}$ (nm) | $\Phi_{\text{FL}}$ | $^{\text{red}}E_{\text{pc}}$ (V) | $^{\text{red}}E_{\text{pa}}$ (V) | $^{\text{red}}E_{1/2}$ (V) | LUMO level (eV) | $T_{\text{d}}$ (5wt% loss) (°C) |
| <b>2a</b> | 306, 398, 421               | 27672, 2294, 2509                              | 300                        | 0.02               | -1.92                            | -1.83                            | -1.88                      | -2.92           | 251                             |
| <b>2b</b> | 312, 408, 431               | 25282, 2403, 2403                              | 300                        | <0.01              | -                                | -                                | -                          | -               | 268                             |
| <b>2c</b> | 318, 410, 434               | 30326, 2580, 2688                              | 300                        | <0.01              | -1.70                            | -1.62                            | -1.66                      | -3.13           | 306                             |
| <b>2d</b> | 316, 413, 436               | 31470, 3157, 3266                              | 300                        | <0.01              | -1.93                            | -1.80                            | -1.86                      | -2.93           | 222                             |
| <b>2e</b> | 309, 397, 419               | 33950, 3223, 3223                              | 300                        | <0.01              | -1.74                            | -1.61                            | -1.67                      | -3.12           | 315                             |
| <b>2f</b> | 311, 392, 418               | 40513, 2715, 2280                              | 300                        | <0.01              | -                                | -                                | -                          | -               | 300                             |
| <b>2g</b> | 310, 395, 418, 445          | 31106, 3635, 4342, 2524                        | 300                        | <0.01              | -1.80                            | -1.72                            | -1.76                      | -3.03           | 277                             |
| <b>4</b>  | 298,308,351, 357            | 8990,9192, 1515, 1313                          | 300                        | 0.15               | -                                | -                                | -                          | -               | 172                             |

## UV-vis and emission spectra

CH<sub>2</sub>Cl<sub>2</sub> (fluorescence spectroscopic grade) was purged with N<sub>2</sub> for 30 min before the measurements. UV-vis and emission spectra of diazahelicenes **2** and cinnoline **4** were measured at room temperature using CH<sub>2</sub>Cl<sub>2</sub> solutions (1.0 × 10<sup>-5</sup> M).

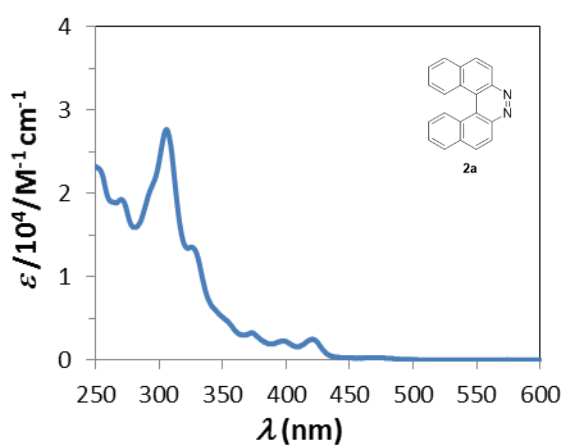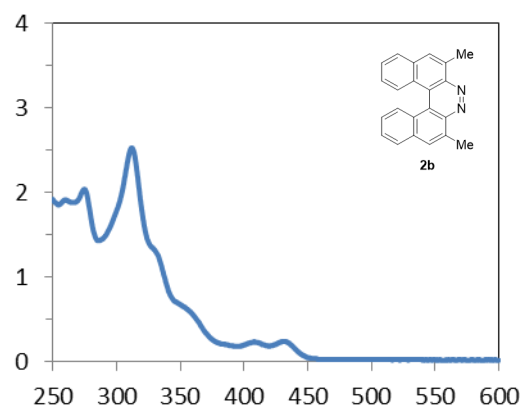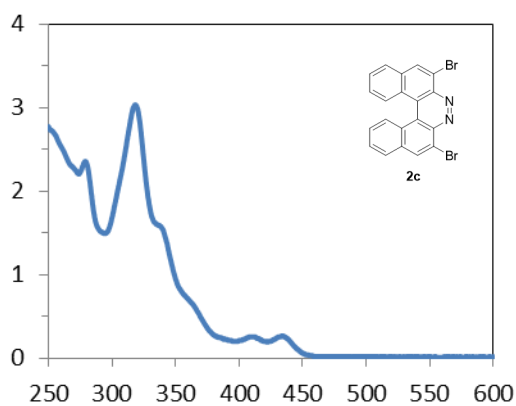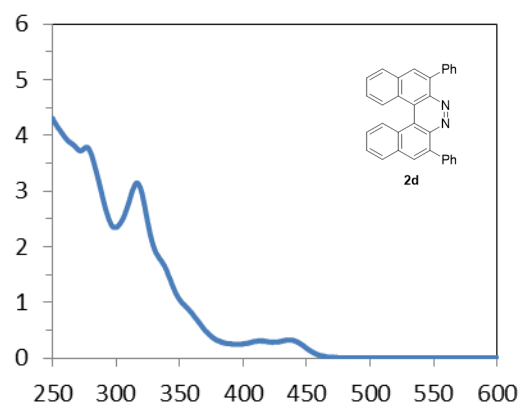

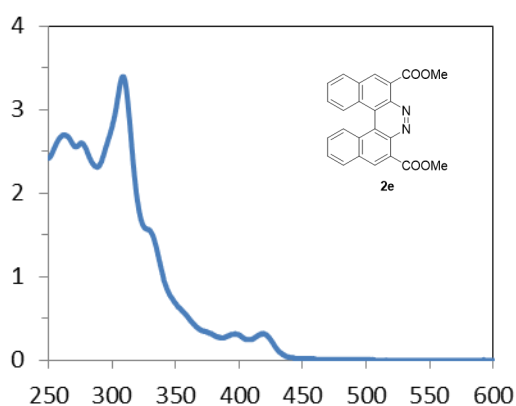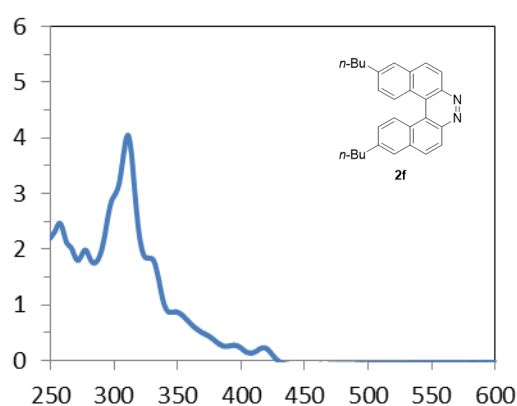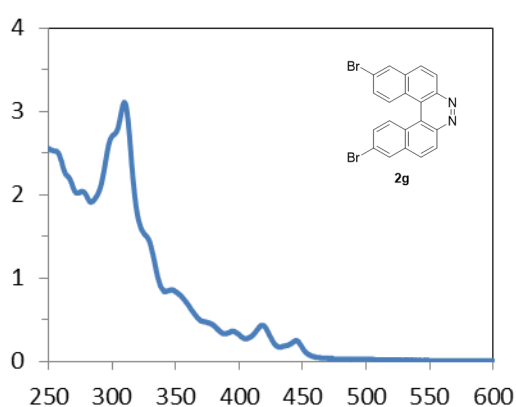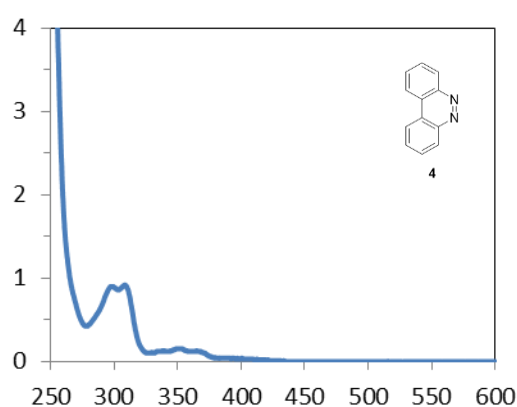

### Cyclic voltammetry

Cyclic voltammetry experiments were conducted at room temperature with  $\text{CH}_2\text{Cl}_2$  solutions of diazahelicenes **2** and cinnoline **4** ( $5.0 \times 10^{-4}$  M) containing 0.1 M tetrabutylammonium hexafluorophosphate as a supporting electrolyte in a cell equipped with a Pt as the working electrode (scanning rate: 100 m/V). A Pt wire and an Ag wire were applied as the counter and the reference electrode, respectively. All the potentials were corrected against the  $\text{Fc}/\text{Fc}^+$  ( $\text{Fc}$  = ferrocene) couple and the values of LUMO levels were calculated with the equation S1.

$$\text{LUMO} = -(4.8 + {}^{\text{red}}E_{1/2} \text{ vs. Fc/Fc}^+) \quad (\text{S1})$$

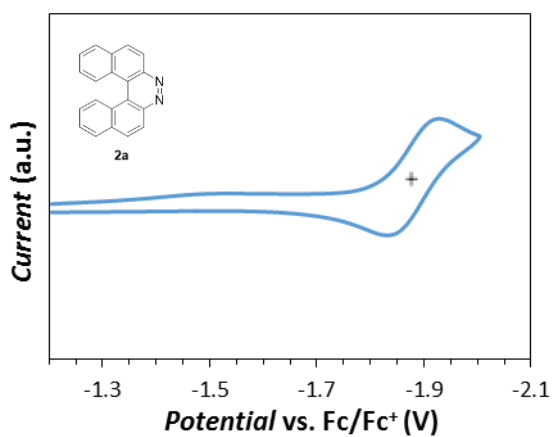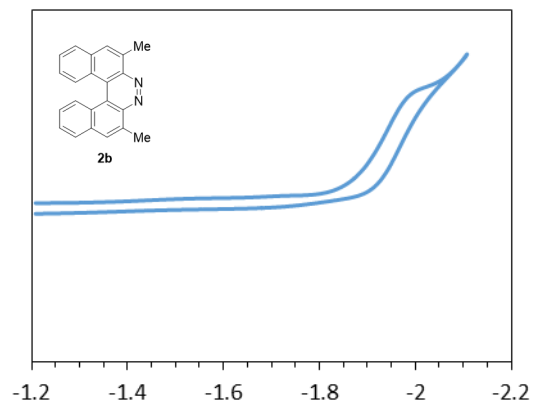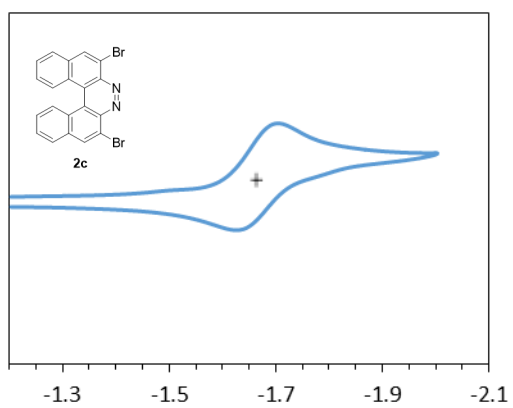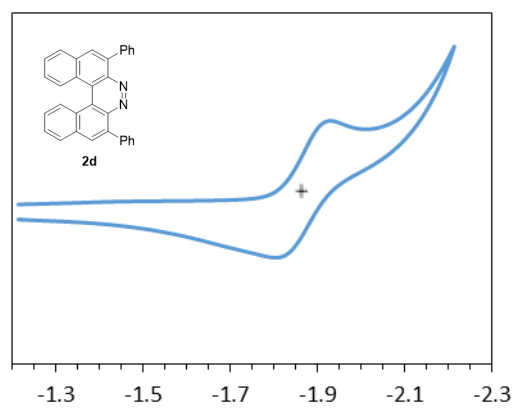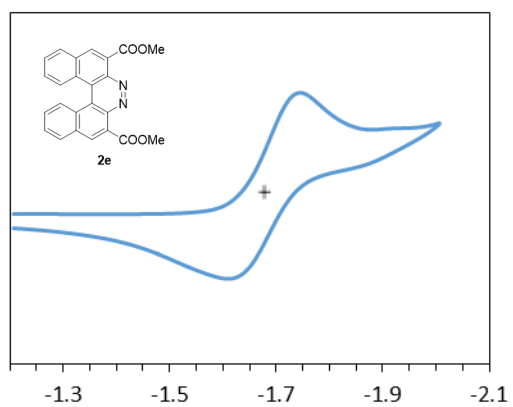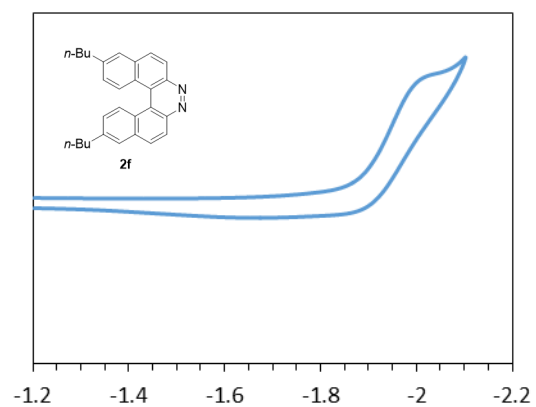

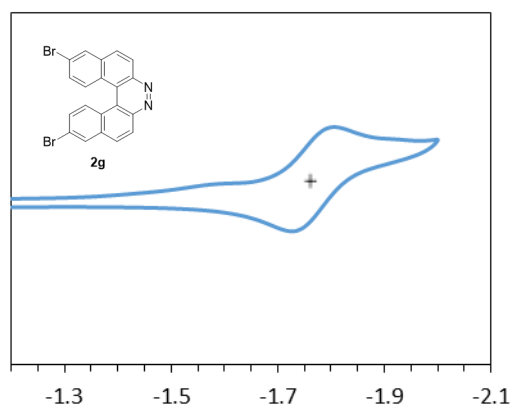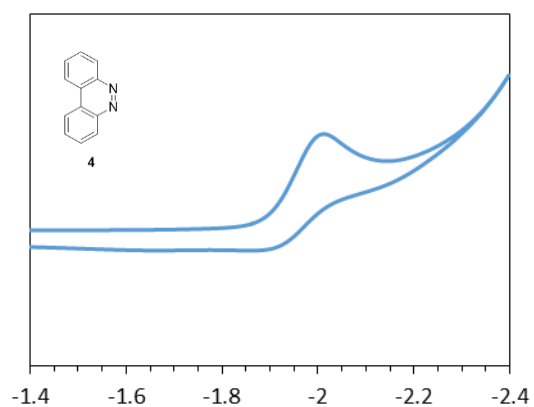

### Thermogravimetric analysis (TGA)

All the TGA profiles of diazahelicenes **2** and cinnoline **4** were measured under the nitrogen flow (200 mL/min), starting from 40 °C to 600 °C at the ramp rate of 10 °C/min.

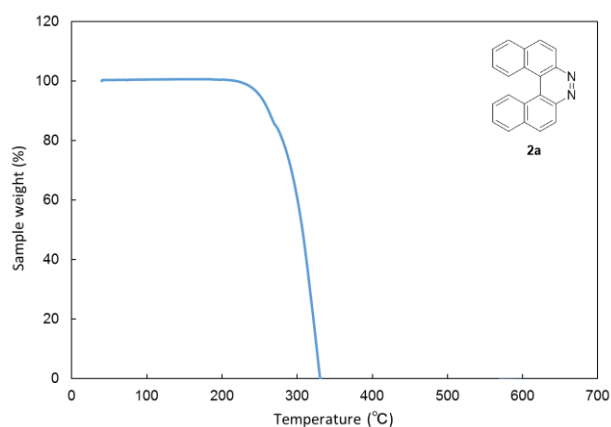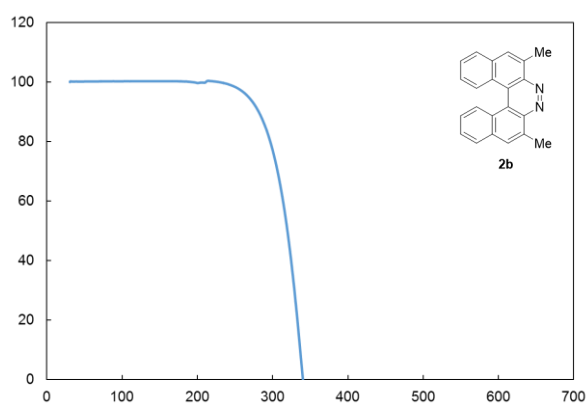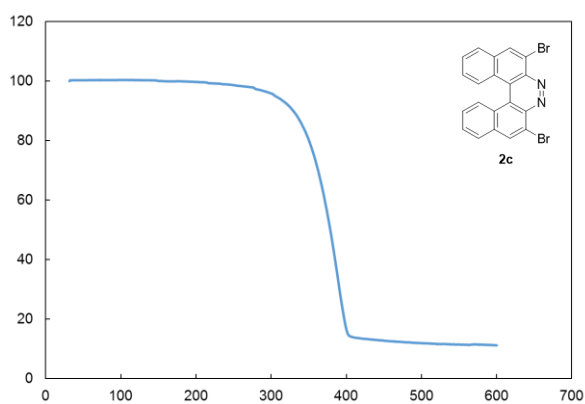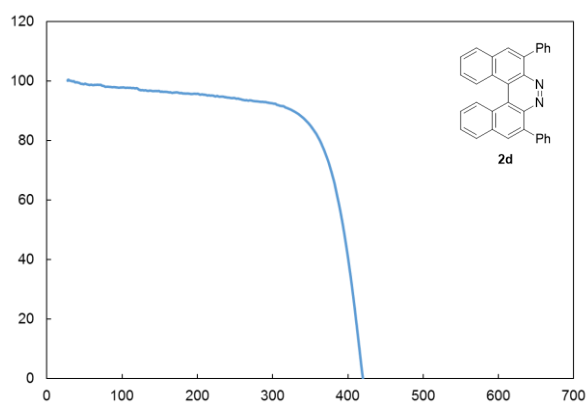

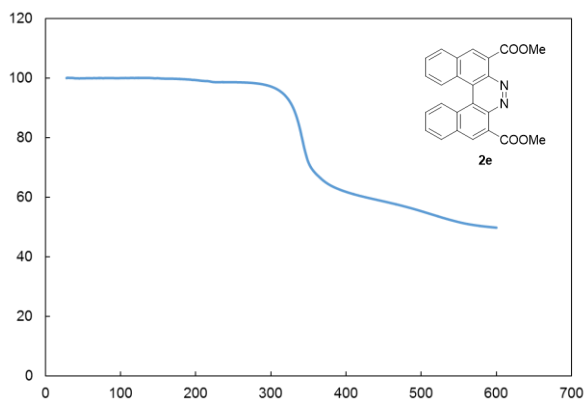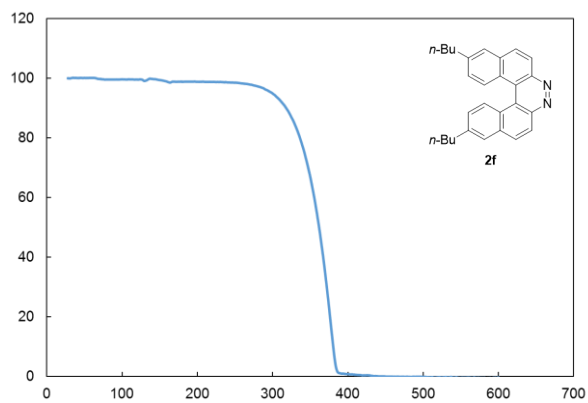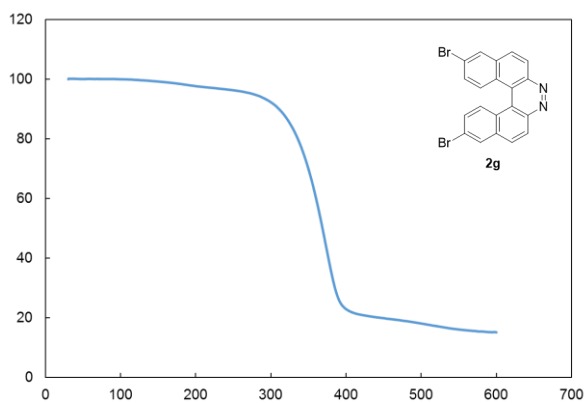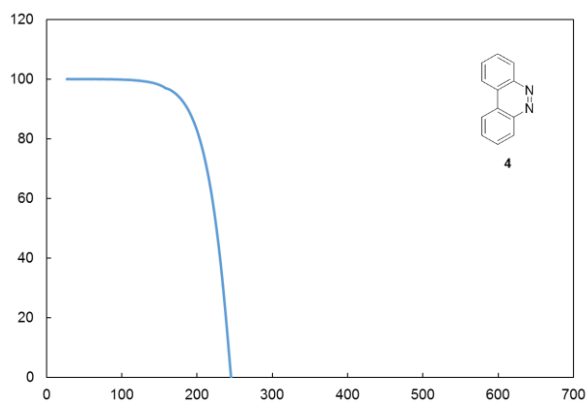



# $^1\text{H}$ and $^{13}\text{C}$ NMR spectra

$^1\text{H}$  NMR: (400 MHz,  $\text{CDCl}_3$ )

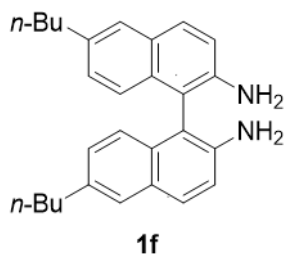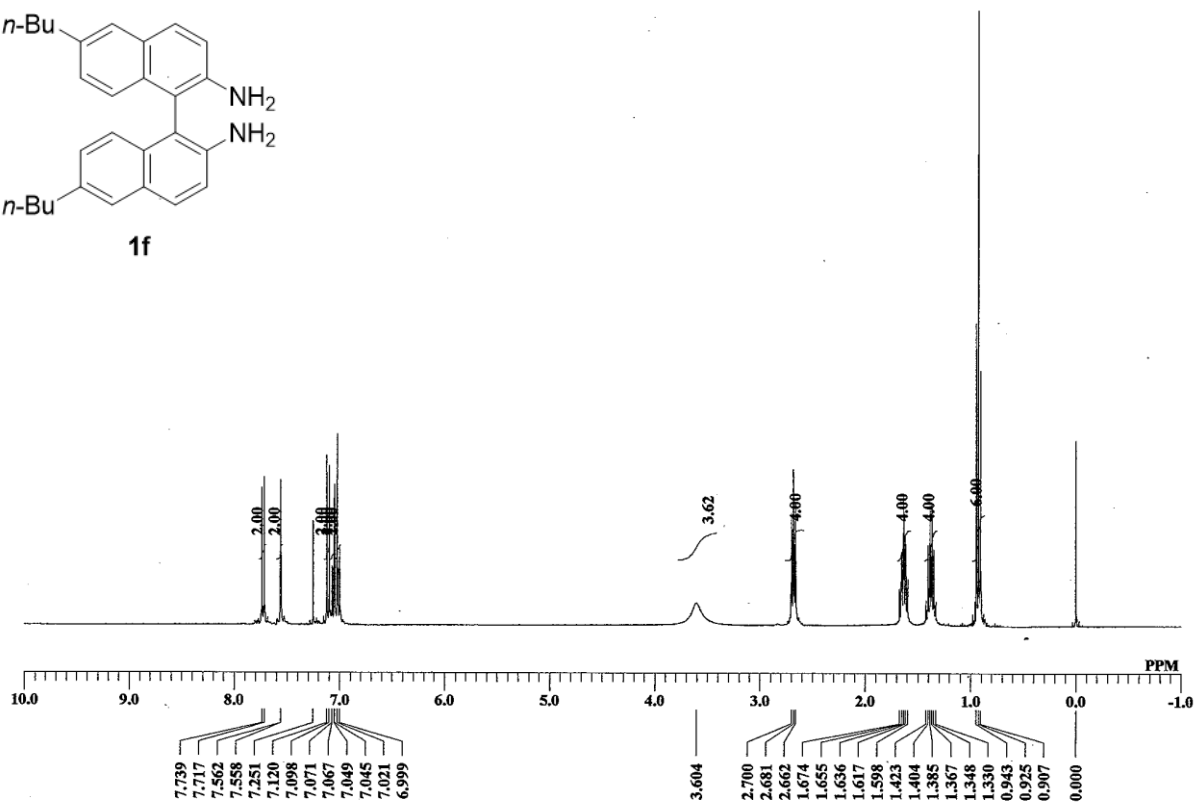

$^{13}\text{C}$  NMR: (100 MHz,  $\text{CDCl}_3$ )

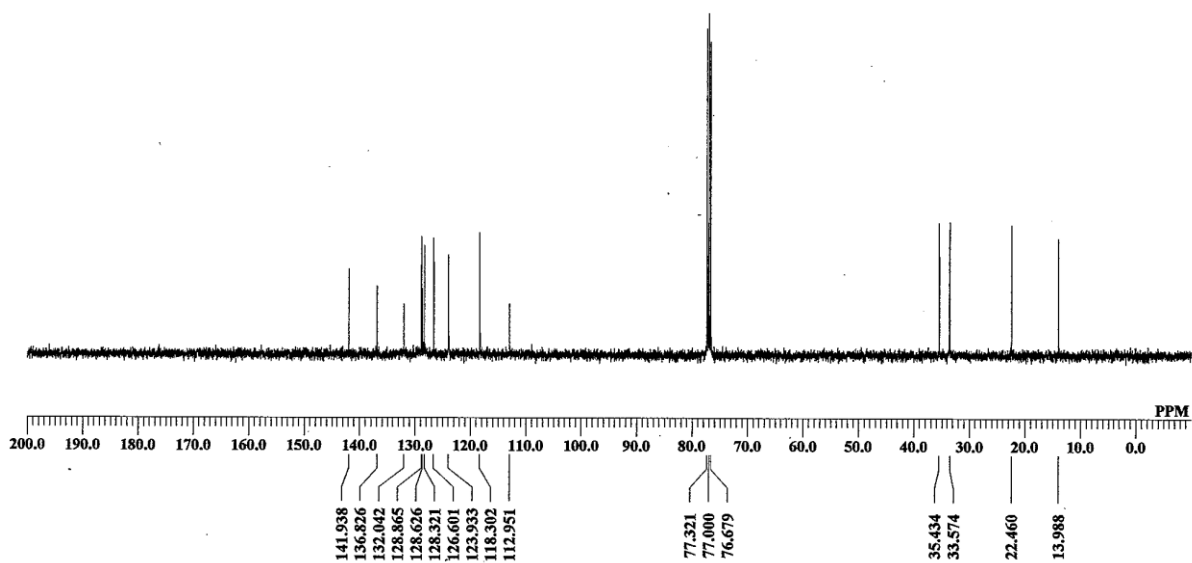

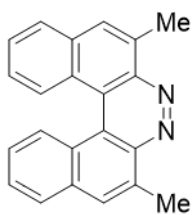

2b

$^1\text{H NMR}$ : (400 MHz,  $\text{CDCl}_3$ )

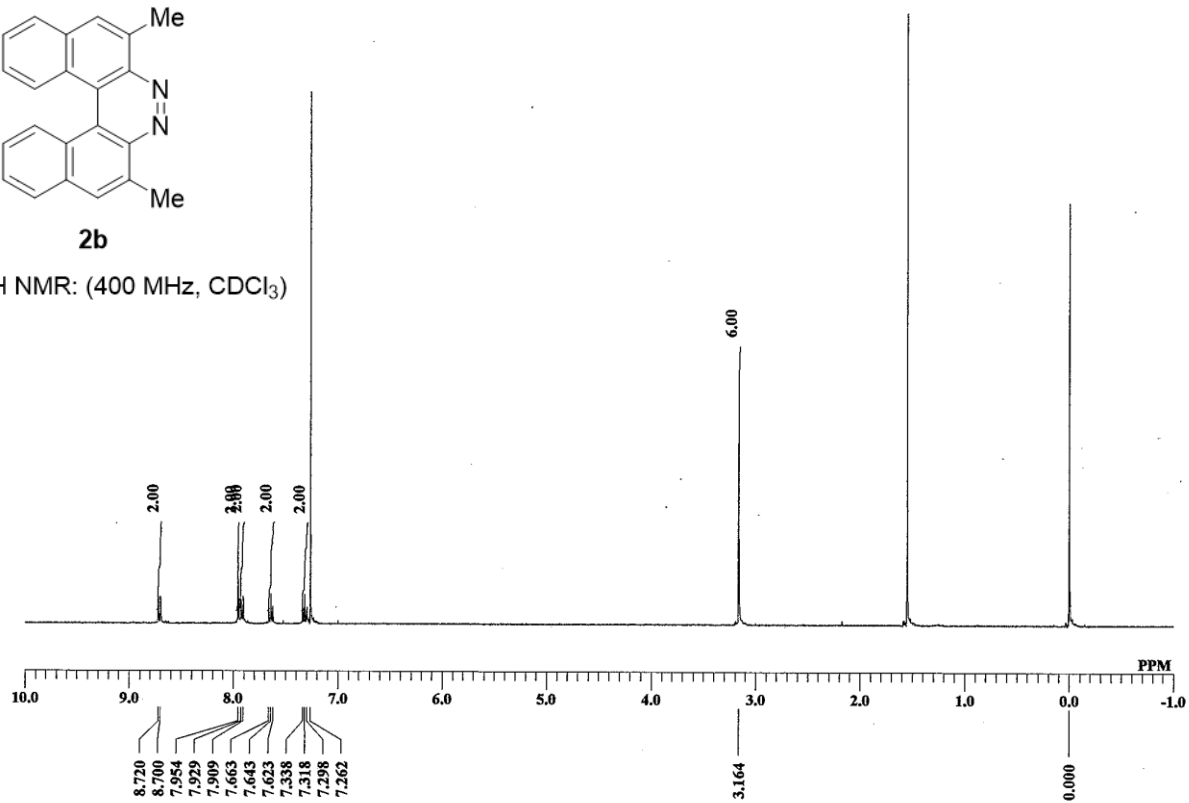

$^{13}\text{C NMR}$ : (100 MHz,  $\text{CDCl}_3$ )

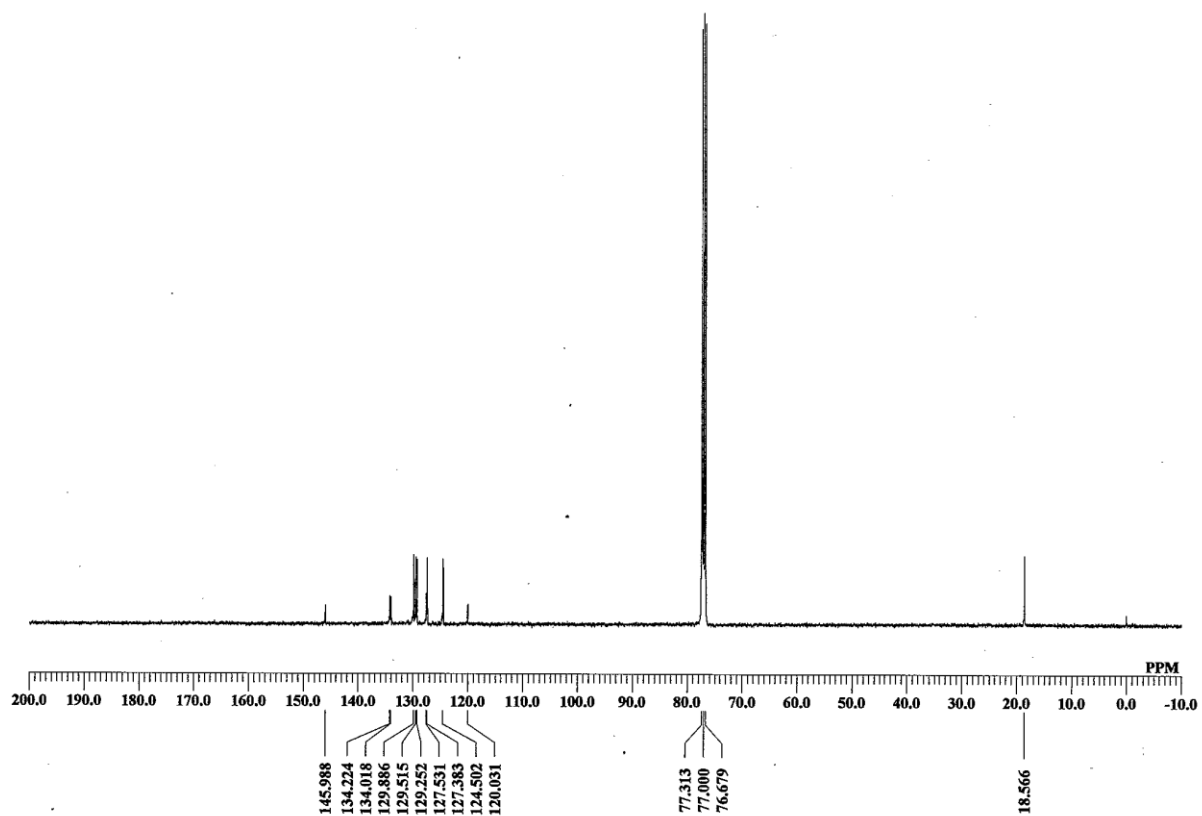

$^1\text{H}$  NMR: (400 MHz,  $\text{CDCl}_3$ )

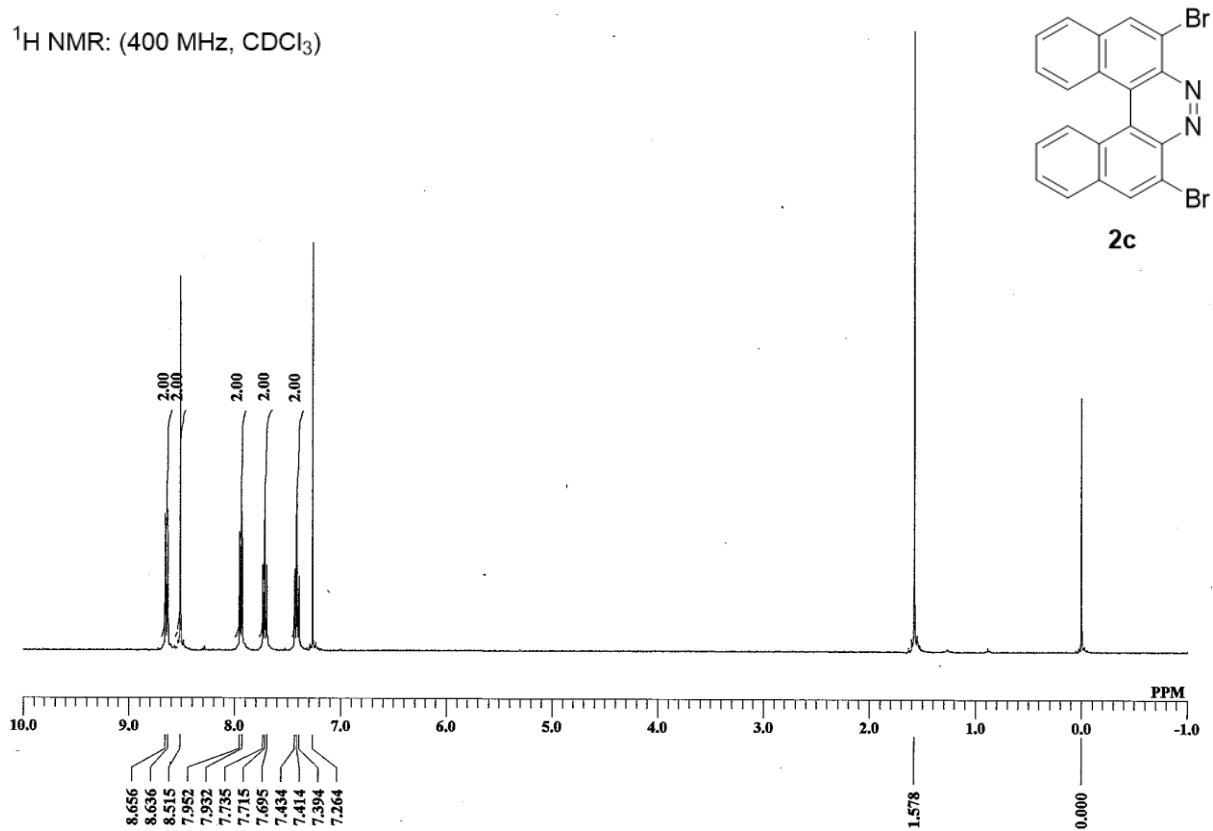

$^{13}\text{C}$  NMR: (100 MHz,  $\text{CDCl}_3$ )

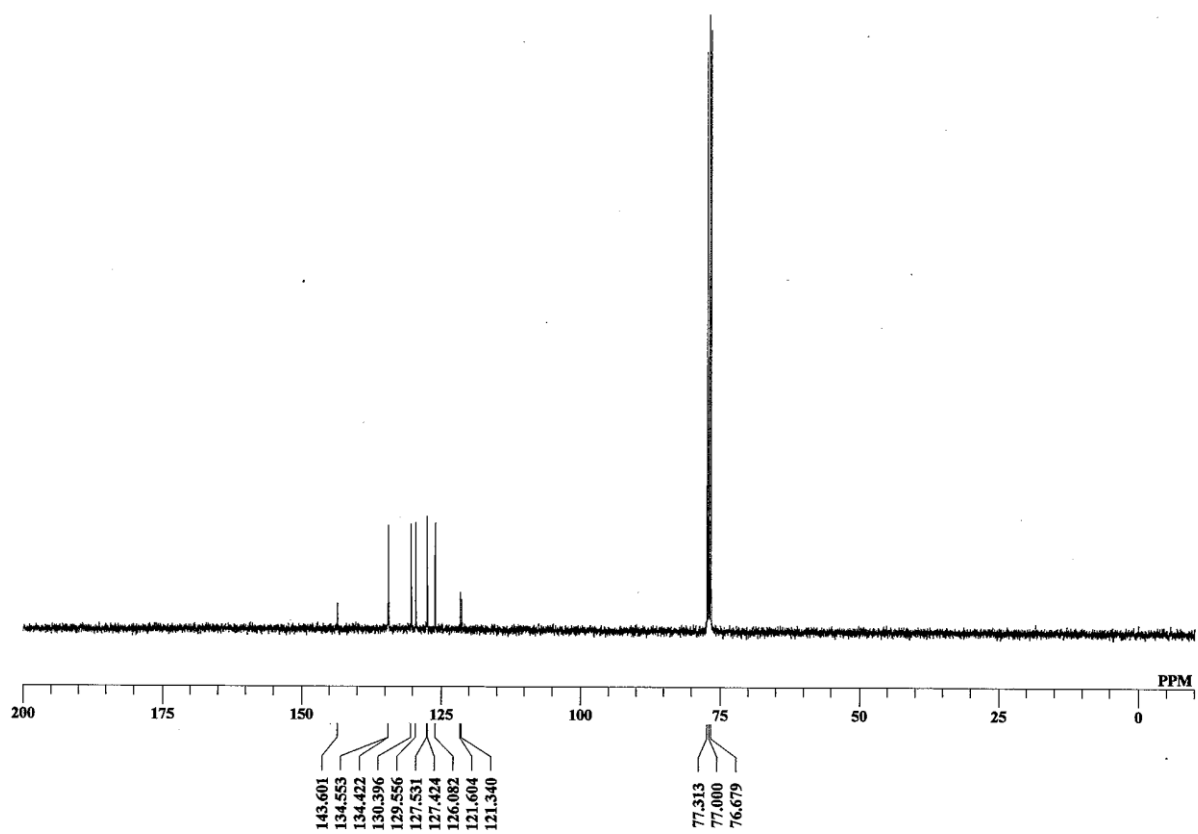

$^1\text{H}$  NMR: (400 MHz,  $\text{CDCl}_3$ )

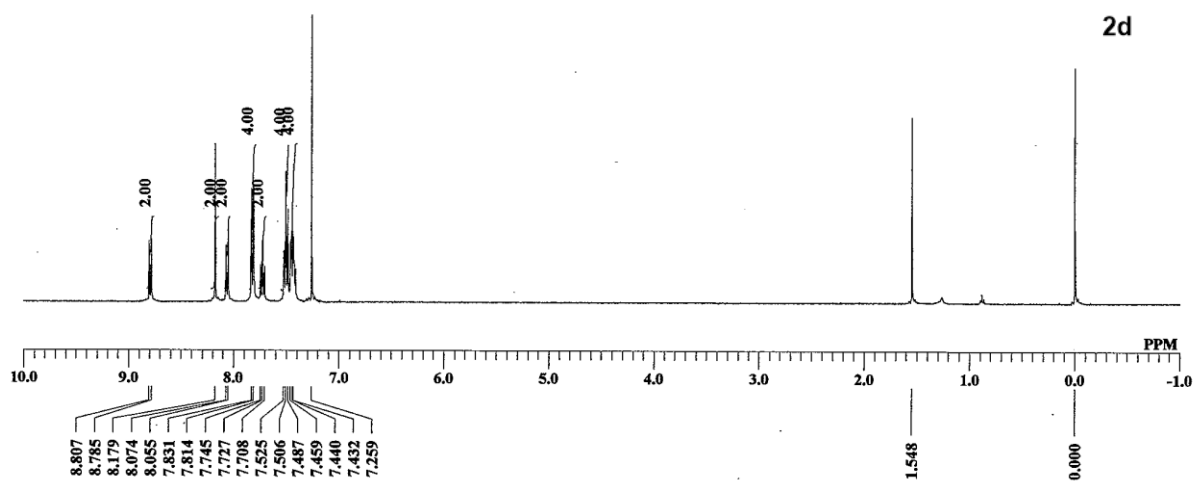

$^{13}\text{C}$  NMR: (100 MHz,  $\text{CDCl}_3$ )

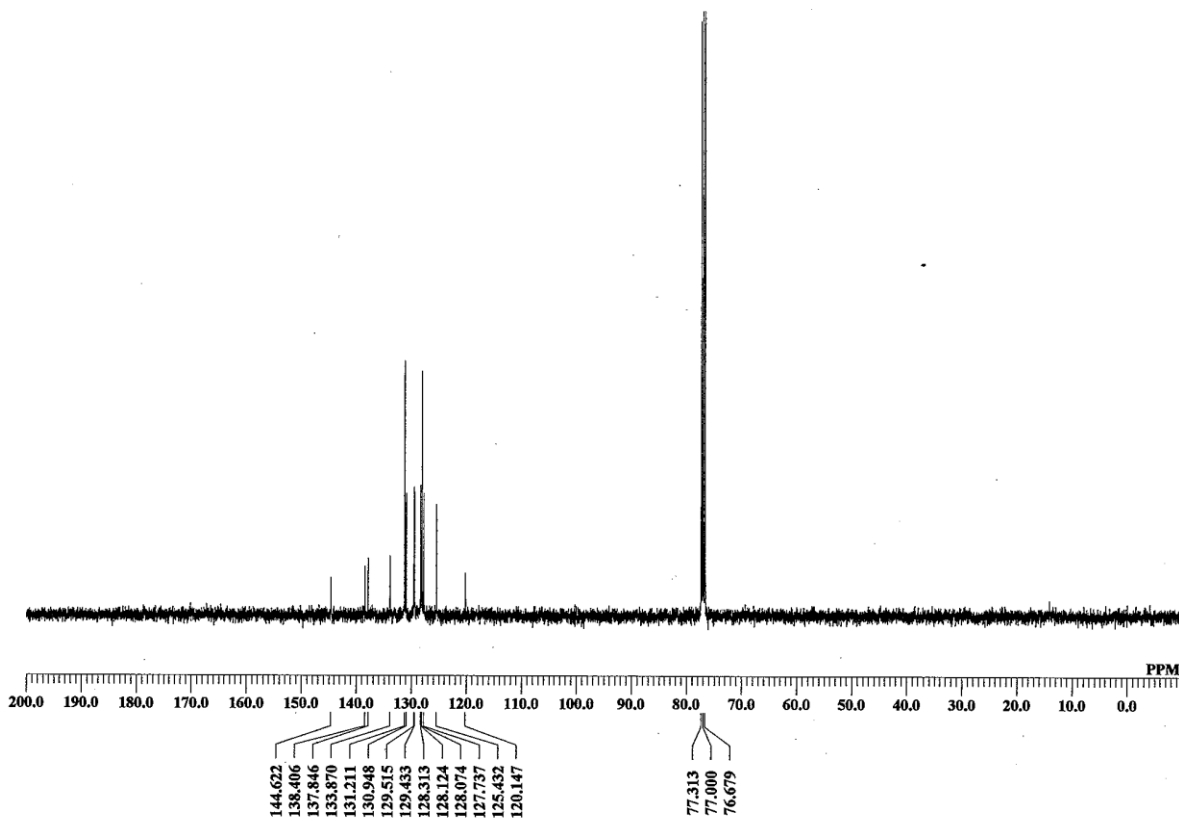

$^1\text{H}$  NMR: (400 MHz,  $\text{CDCl}_3$ )

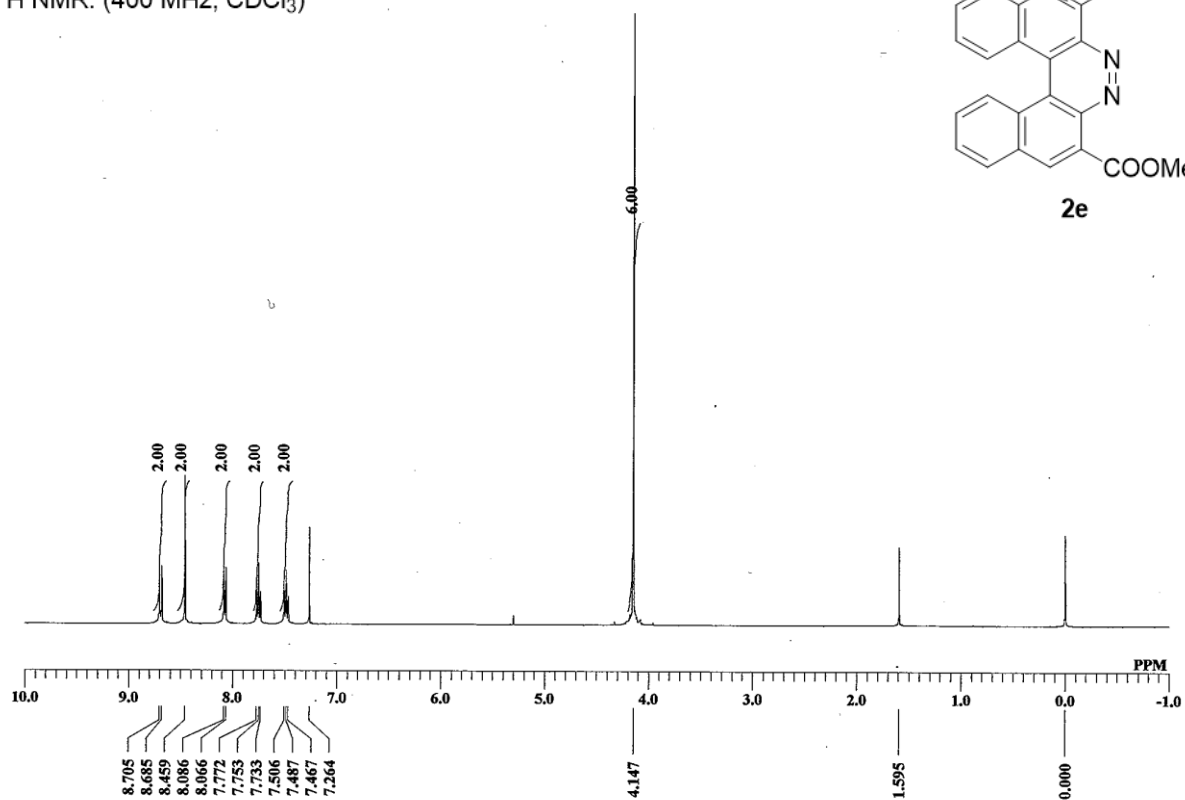

$^{13}\text{C}$  NMR: (100 MHz,  $\text{CDCl}_3$ )

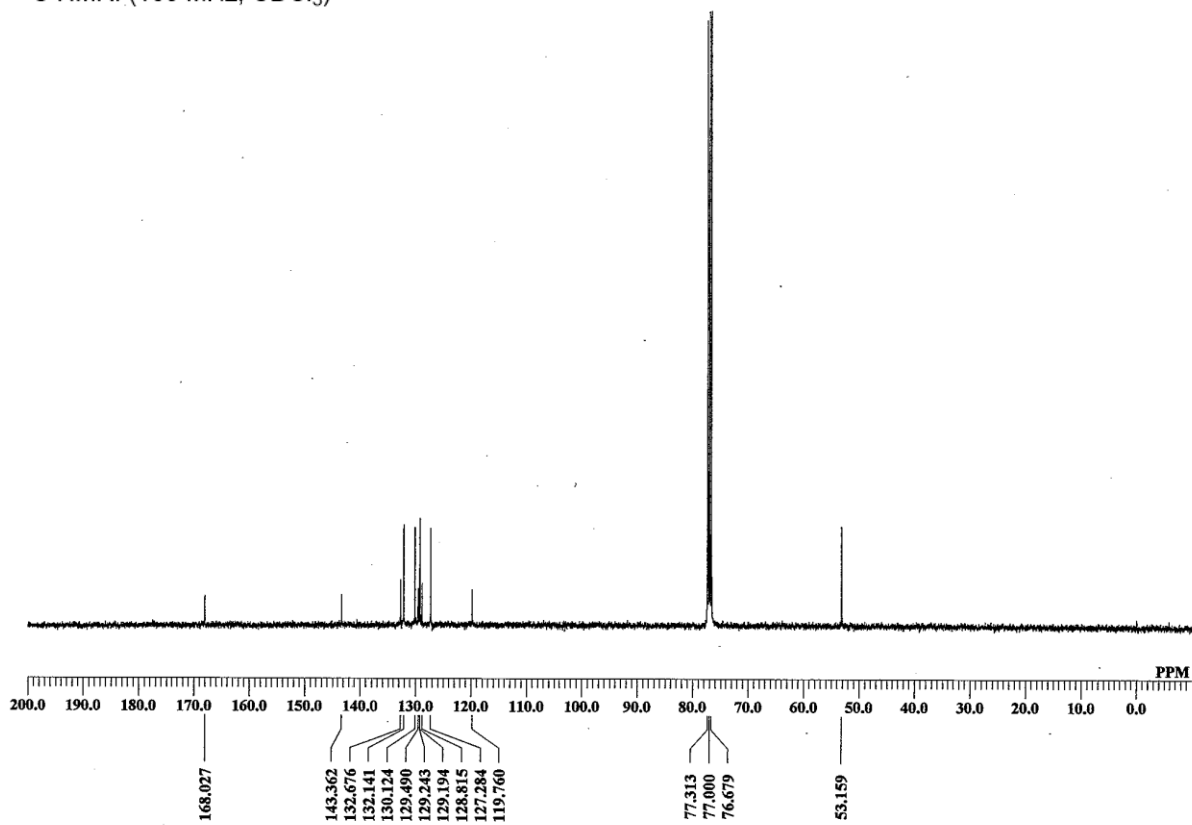

$^1\text{H}$  NMR: (400 MHz,  $\text{CDCl}_3$ )

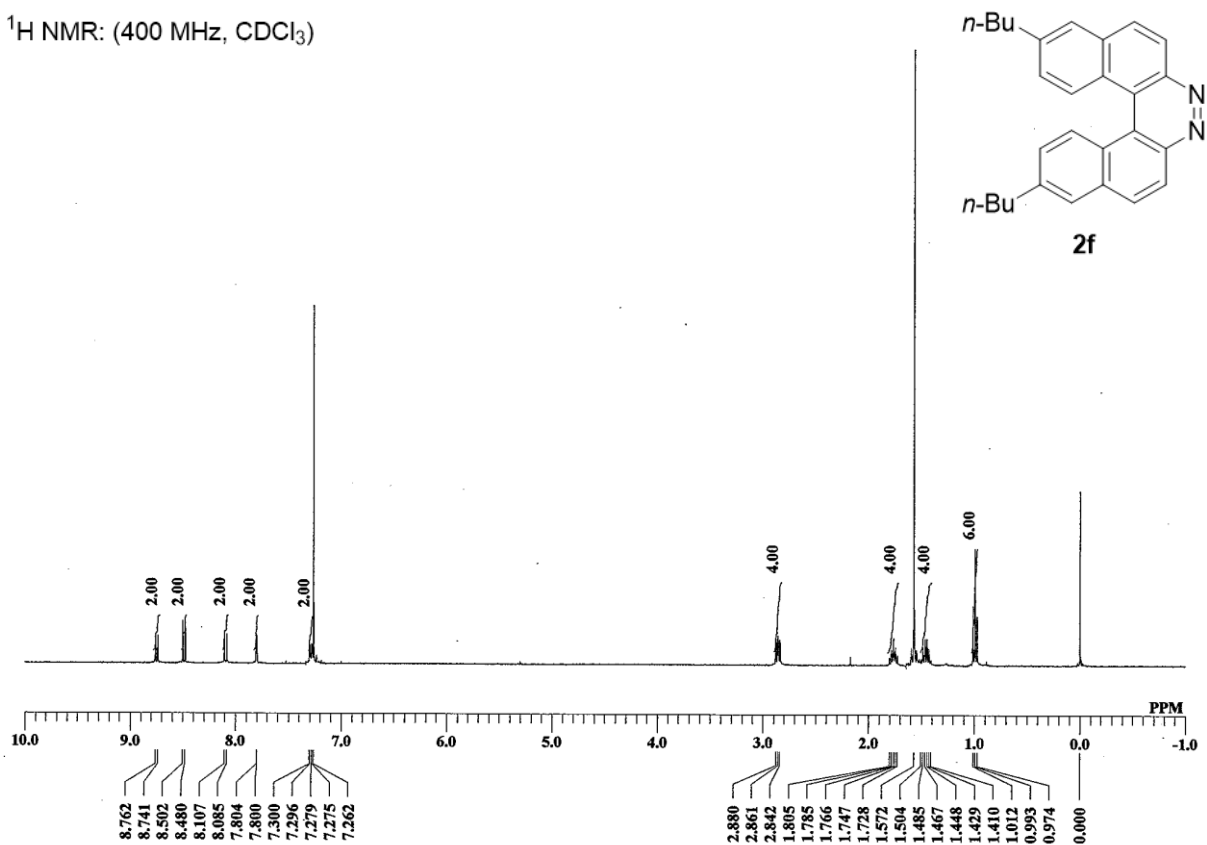

$^{13}\text{C}$  NMR: (100 MHz,  $\text{CDCl}_3$ )

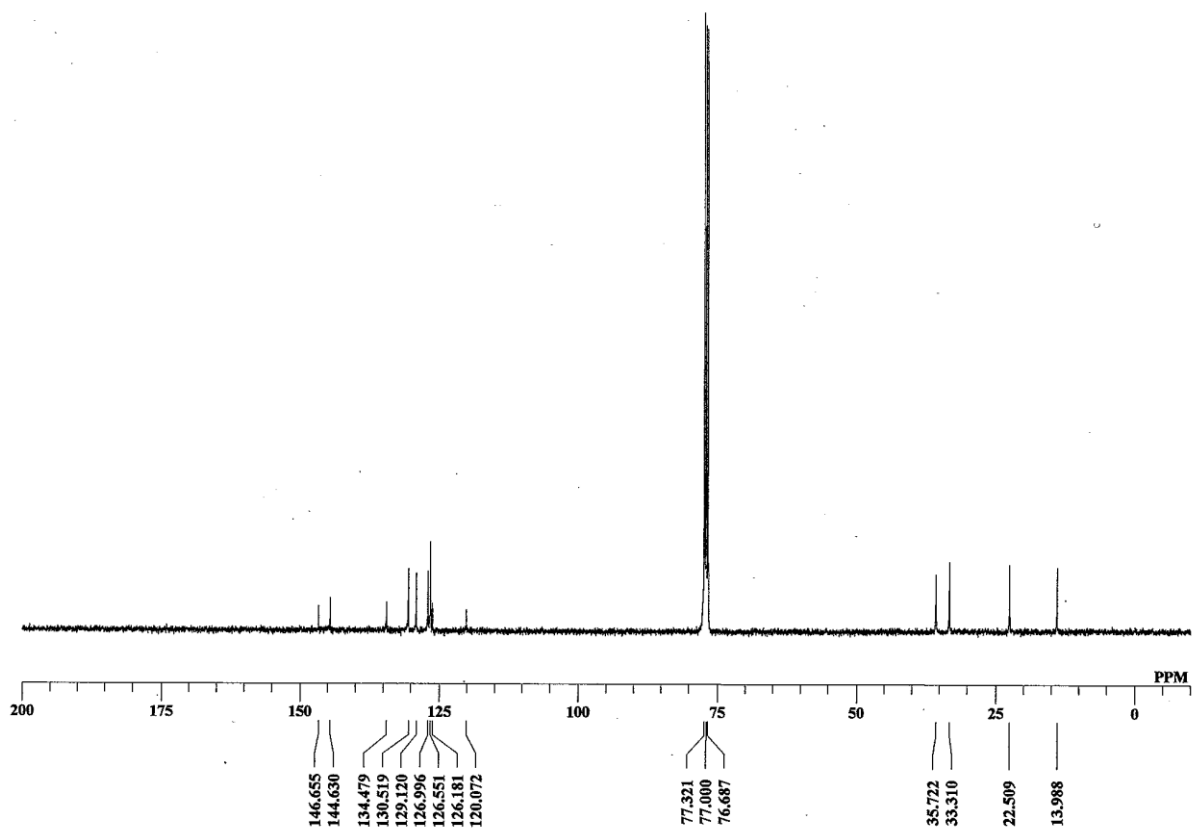

$^1\text{H}$  NMR: (400 MHz,  $\text{CDCl}_3$ )

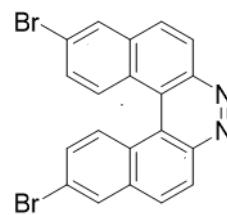

2g

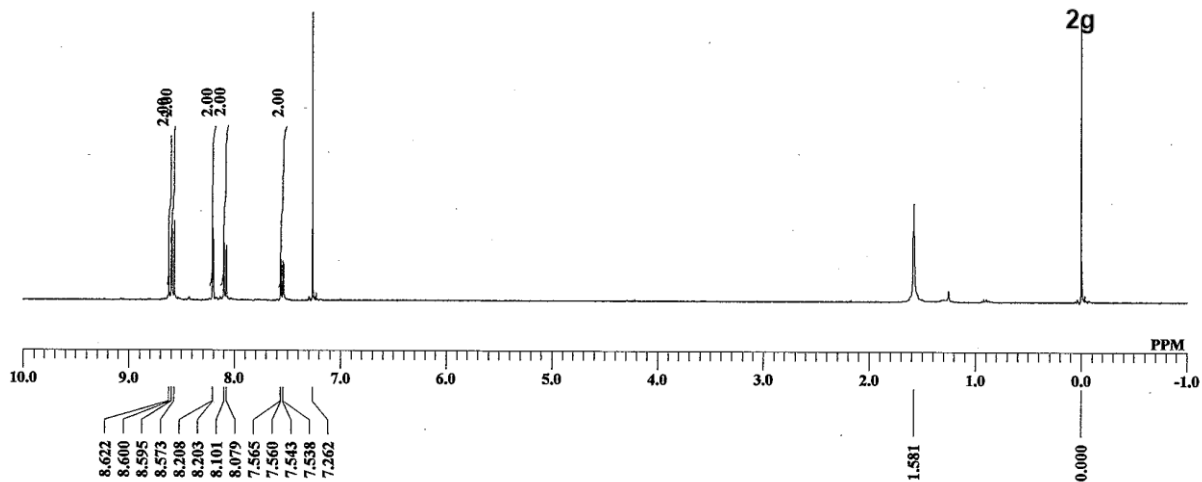

$^{13}\text{C}$  NMR: (100 MHz,  $\text{CDCl}_3$ )

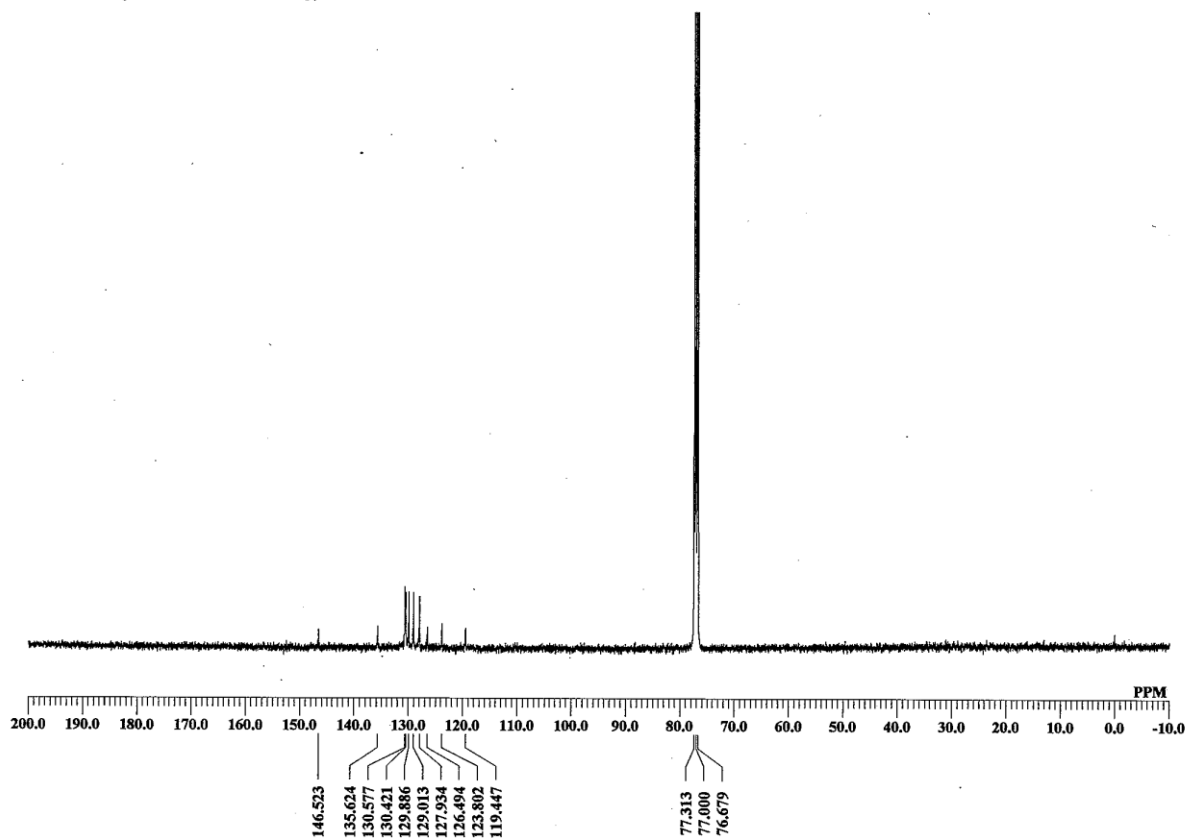

## References

- S1 Mikami, K.; Korenaga, T.; Yusa, Y.; Yamanaka, M. *Adv. Synth. Catal.* **2003**, *345*, 246.
- S2 Kano, T.; Tanaka, Y.; Osawa, K.; Yurino, T.; Maruoka, K. *J. Org. Chem.* **2008**, *73*, 7387.
- S3 Scarborough, C. C.; McDonald, R. I.; Hartmann, C.; Sazama, G. T.; Bergant, A.; Stahl, S. S. *J. Org. Chem.* **2009**, *74*, 2613.
- S4 (a) Taffarel, E.; Chirayil, S.; Thummel, R. P. *J. Org. Chem.* **1994**, *59*, 823. (b) Smrcina, M.; Vyskocil, S.; Maca, B.; Polasek, M.; Claxton, T. A.; Abbott, A. P.; Kocovsky, P. *J. Org. Chem.* **1994**, *59*, 2156.
- S5 (a) Vilches-Herrera, M.; Miranda-Sepúlveda, J.; Rebolledo-Fuentes, M.; Fierro, A.; Lühr, S.; Iturriaga-Vasquez, P.; Cassels, B. K.; Reyes-Parada, M. *Bioorg. Med. Chem.* **2009**, *17*, 2452. (b) Yan, P.; Millard, A. C.; Wei, M.; Loew, L. M. *J. Am. Chem. Soc.* **2006**, *128*, 11030.
- S6 Dehghanpour, S.; Afshariazar, F.; Assoud, J. *Polyhedron* **2012**, *35*, 69.
- S7 Manolikakes, G.; Hernandez, C. M.; Schade, M. A.; Metzger, A.; Knochel, P. *J. Org. Chem.* **2008**, *73*, 8422.
- S8 Caronna, T.; Fontana, F.; Mele, A.; Sora, I. N.; Panzeri, W.; Viganò, L. *Synthesis* **2008**, 413.
- S9 Takeda, Y.; Okazaki, M.; Minakata, S. *Chem. Commun.* **2014**, *50*, 10291.
- S10 Holt, P. F.; Smith, A. E. *J. Chem. Soc.* **1965**, 7088.
- S11 Bjørsvik, H. R.; González, R. R.; Liguori, L. *J. Org. Chem.* **2004**, *69*, 7720.
